# Supplementary material for: Distinct mechanisms for sebaceous gland self-renewal and regeneration provide durability in response to injury
Source: PubMed Central journal article supplement — bioRxiv. 2023 May 5:2023.05.05.539454. Preprint. [Version 1] doi: 10.1101/2023.05.05.539454 (PMC10187279; doi:10.1101/2023.05.05.539454), 2023-05-05

# Veniaminova, Jia\_Fig S1

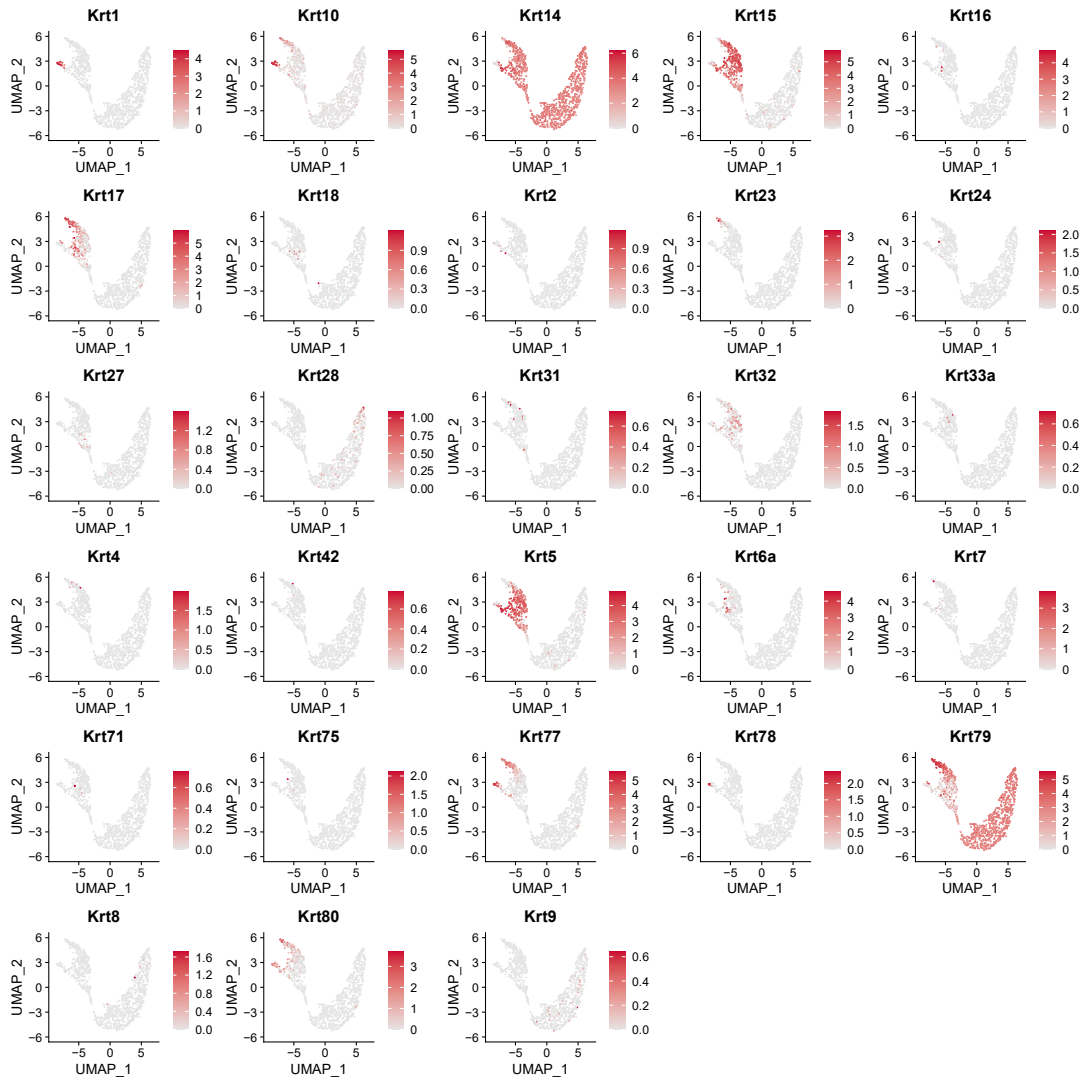



# Veniaminova, Jia\_Fig S3

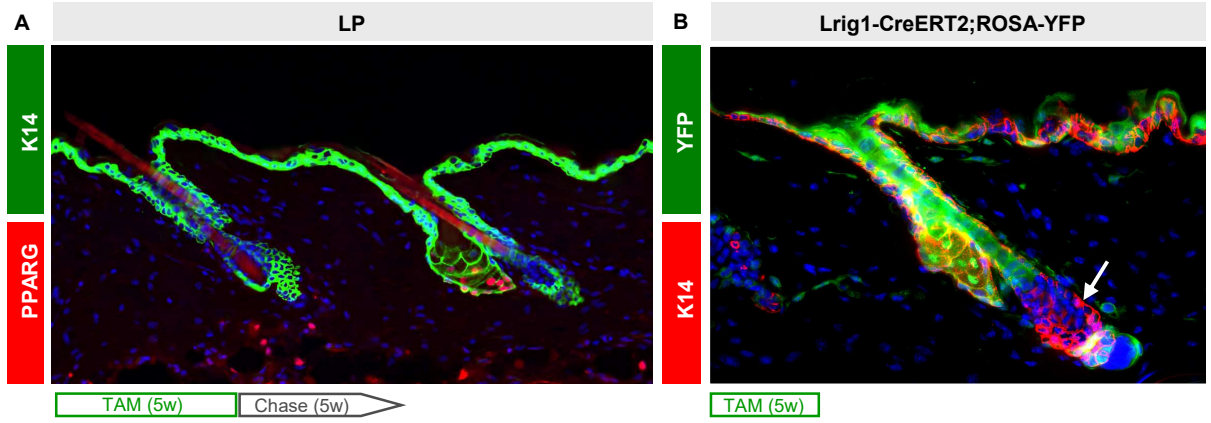

# Veniaminova, Jia\_Fig S4

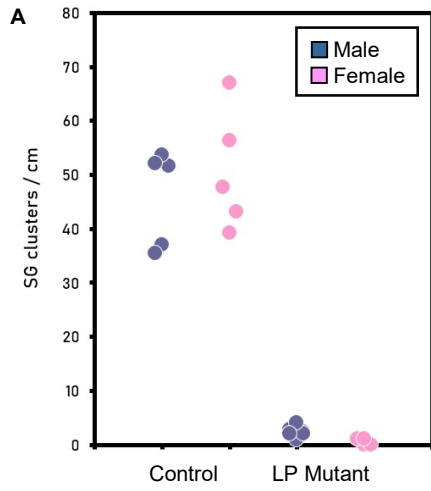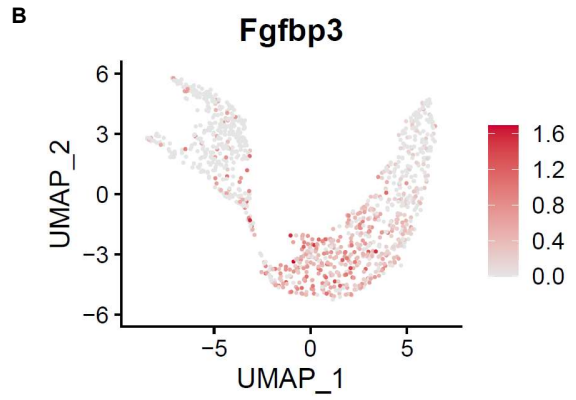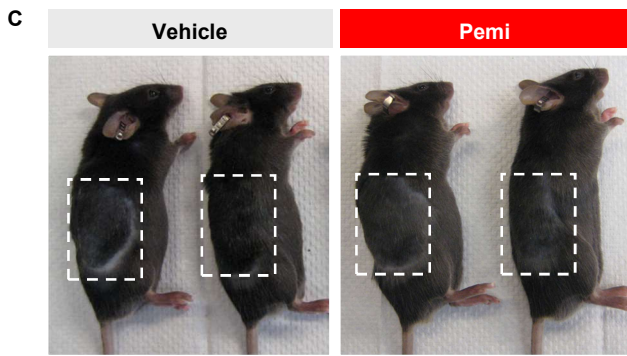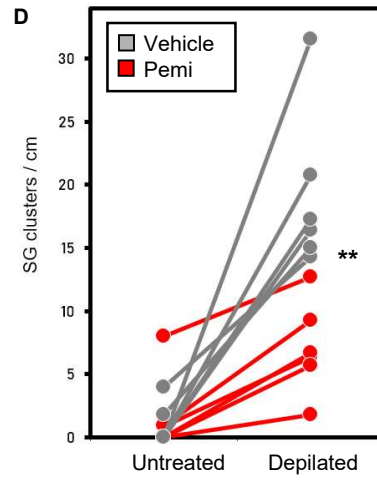

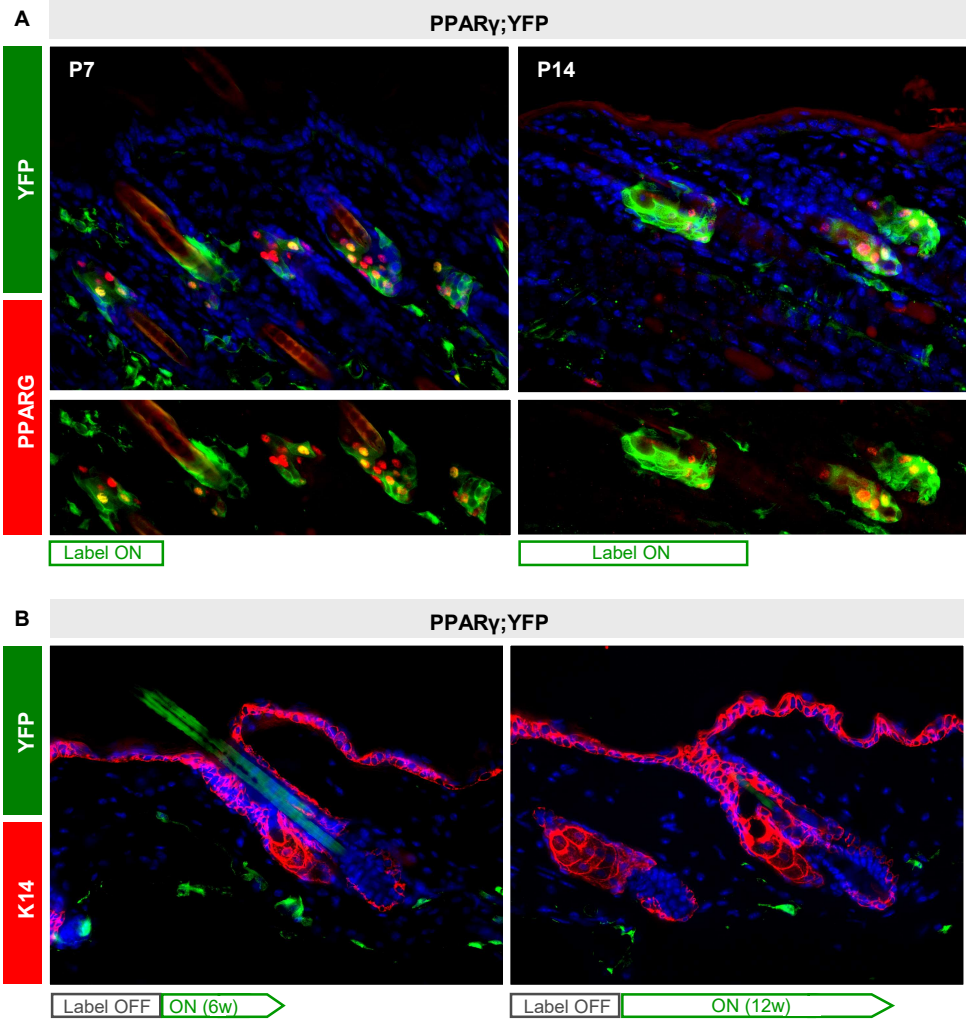

# Veniaminova, Jia\_Fig S6

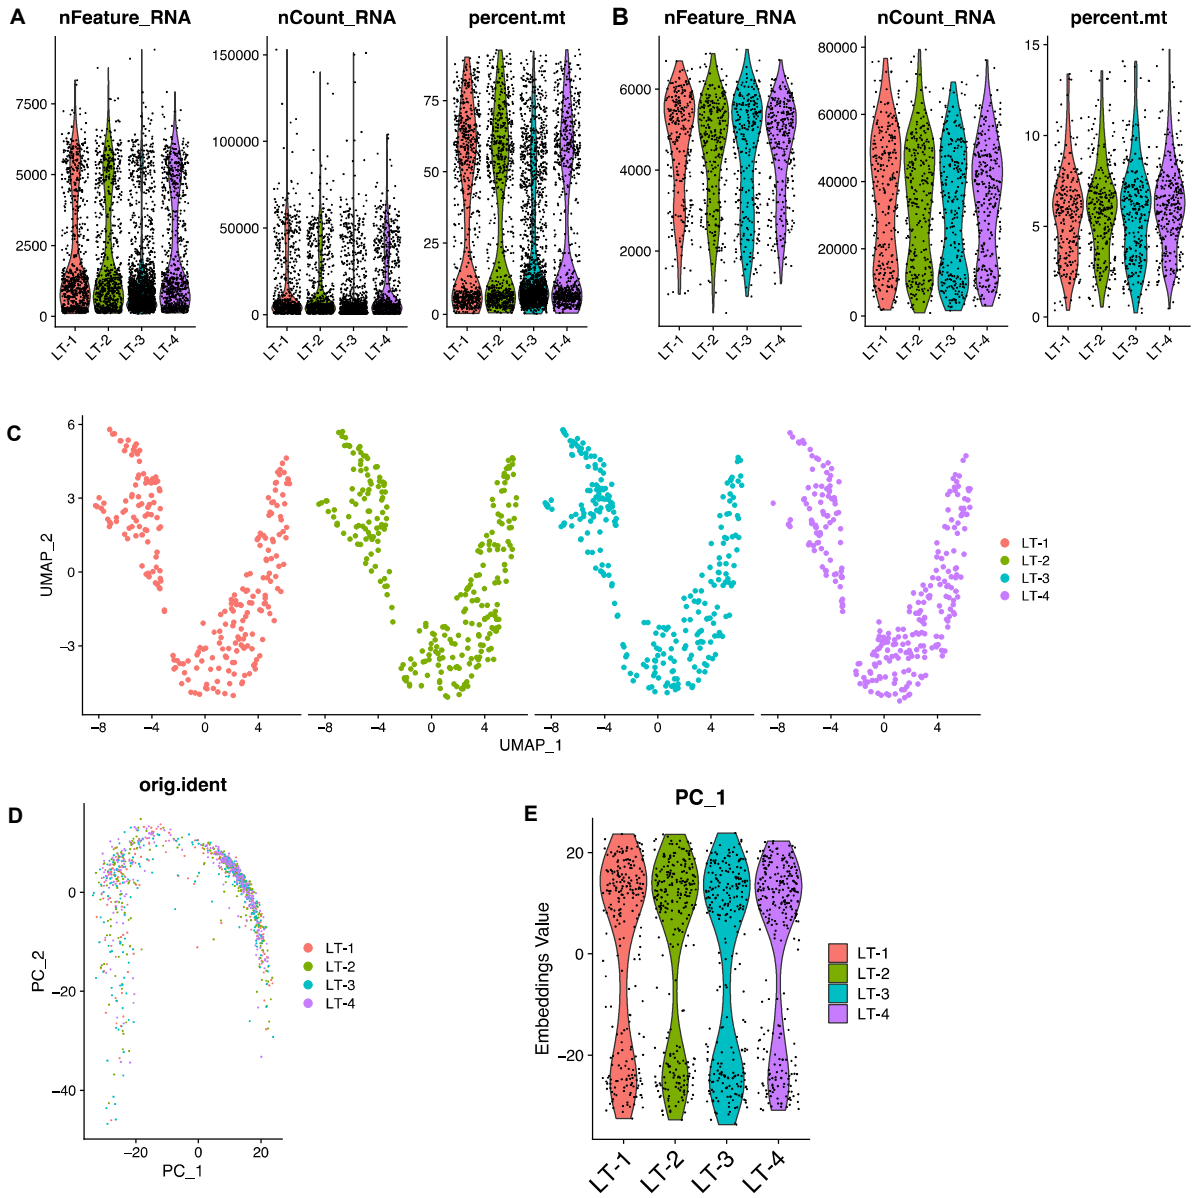

# Veniaminova, Jia\_Fig S7

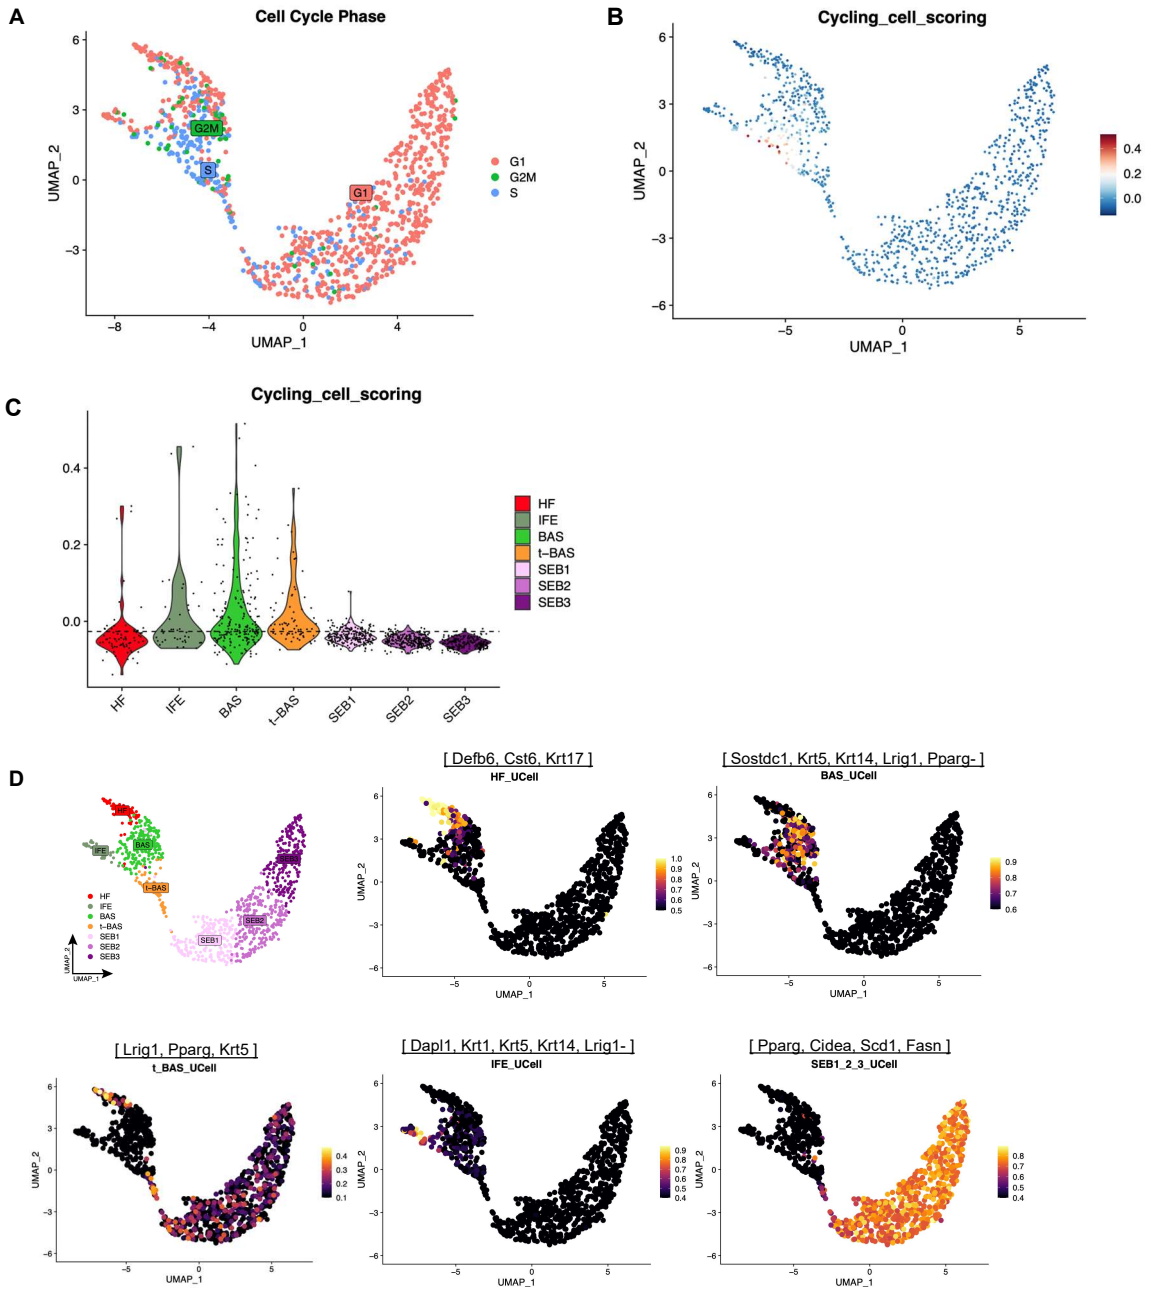

Supplement: media-1.pdf [file media-1.pdf]
